# Supplementary material for: Experimental study of forced convection heat transport in porous media
Source: Copernicus journal article supplement (doi:10.5194/npg-25-279-2018), 2018-04-06
Supplement: Supplementary file 1 [file npg-25-279-2018-supplement.zip]

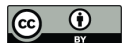

*Supplement of*

## **Experimental study of forced convection heat transport in porous media**

**Nicola Pastore et al.**

*Correspondence to:* Nicola Pastore ([nicola.pastore@poliba.it](mailto:nicola.pastore@poliba.it)) and Claudia Cherubini ([chrclld@unife.it](mailto:chrclld@unife.it))

- [npg-25-279-2018-supplement-title-page.pdf](#)
- [experimental\\_data.mat](#)

The copyright of individual parts of the supplement might differ from the CC BY 4.0 License.
